# Supplementary material
Source: PubMed Central journal article supplement (PMC5728453)
Supplement: ba001917-suppl1.pdf [file ba001917-suppl1.pdf]

## SUDHL4

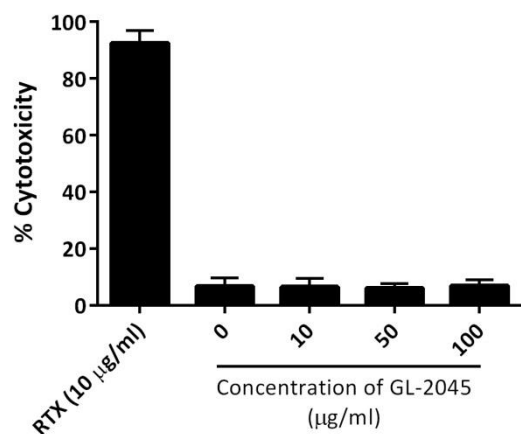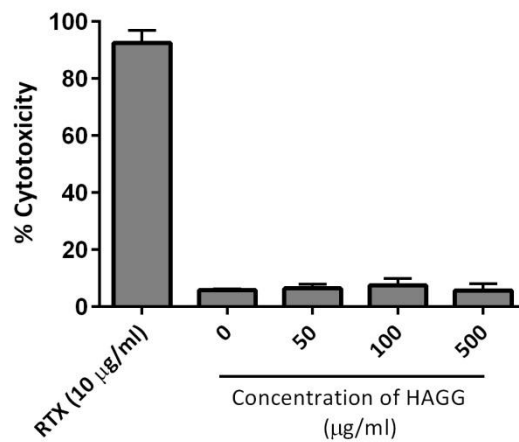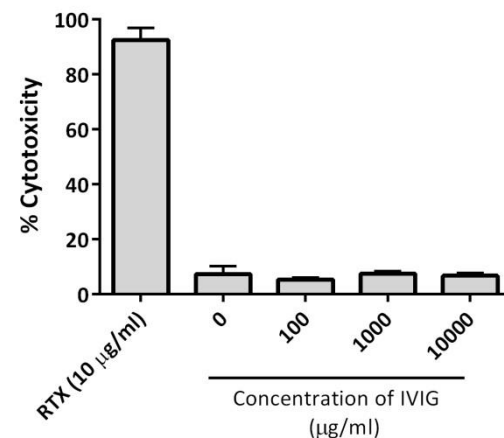

## Ramos

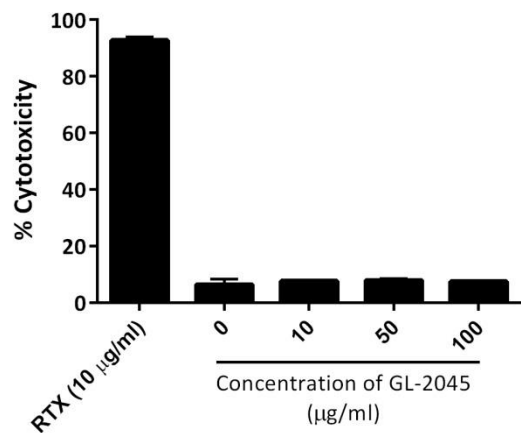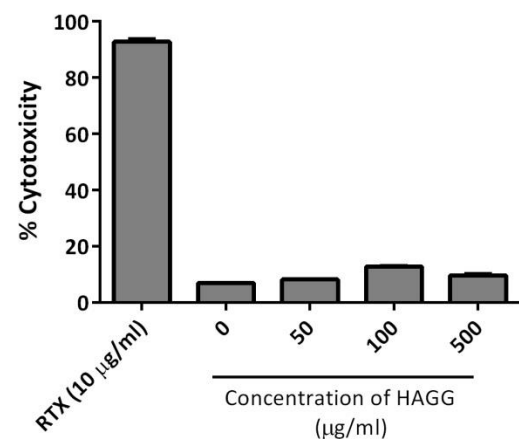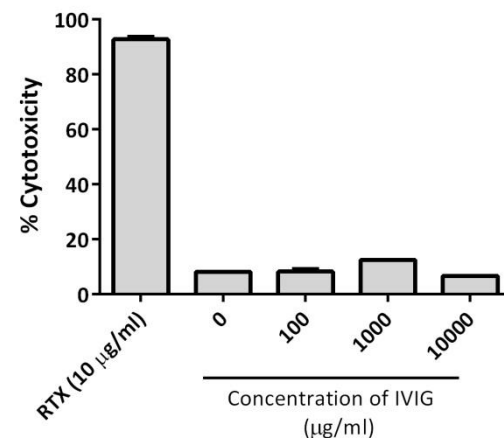

**Supplemental Figure 1: GL-2045 does not mediate CDC.** To determine if GL-2045 mediated CDC, GL-2045 (10, 50, or 100 µg/ml), HAGG (50, 100 or 500 µg/ml), IVIG (100 µg/ml, 1 or 10 mg/ml) or RTX (10 µg/ml) were incubated with SUDHL4 or Ramos cells for 45 minutes in the presence of 6% NHS. Cytotoxicity was determined by 7-AAD/Annexin V staining.

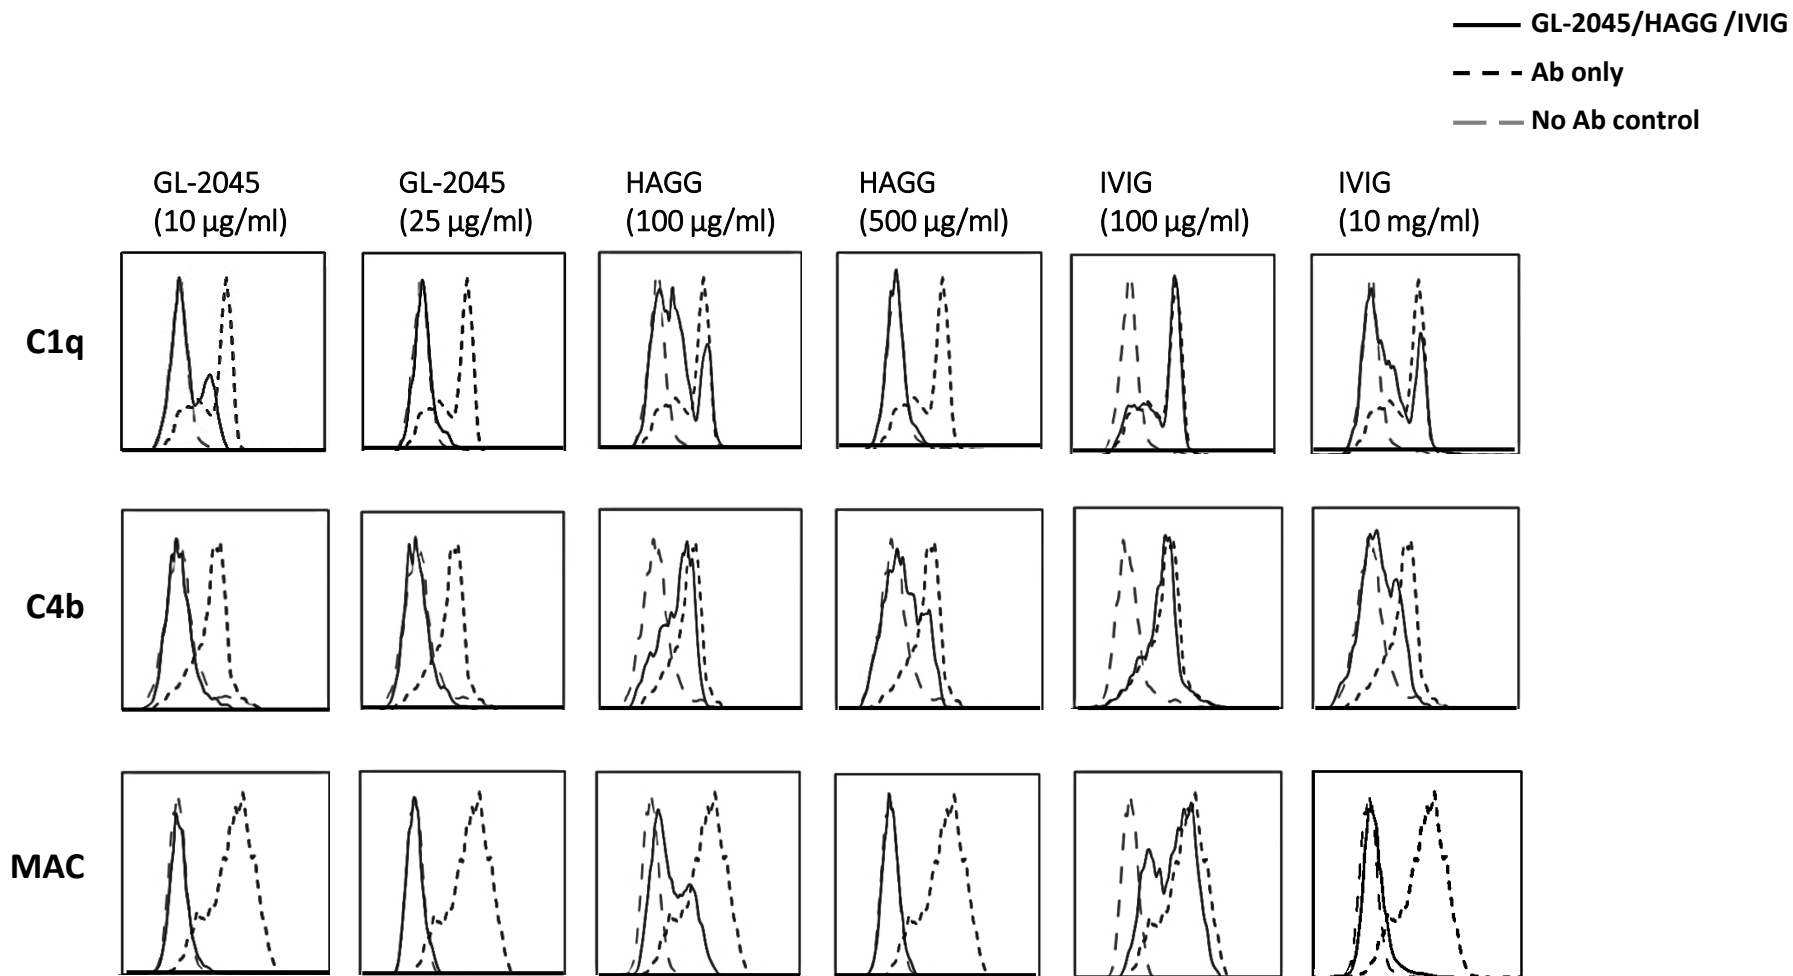

**Supplemental Figure 2. A representative flow analysis of GL-2045 blocking RTX mediated C1q, C4b and MAC deposition.** Complement serum was pretreated with GL-2045, HAGG or IVIG for 15 minutes at 37°C and then added to RTX opsonized Ramos cells. Incubations were carried out for 15 minutes for C1q and C4b deposition or 30 minutes for MAC formation. The cells were stained with FITC conjugated anti-C1q, anti-C4b, or anti-C5b-9 to examine C1q, C4b, or MAC deposition.

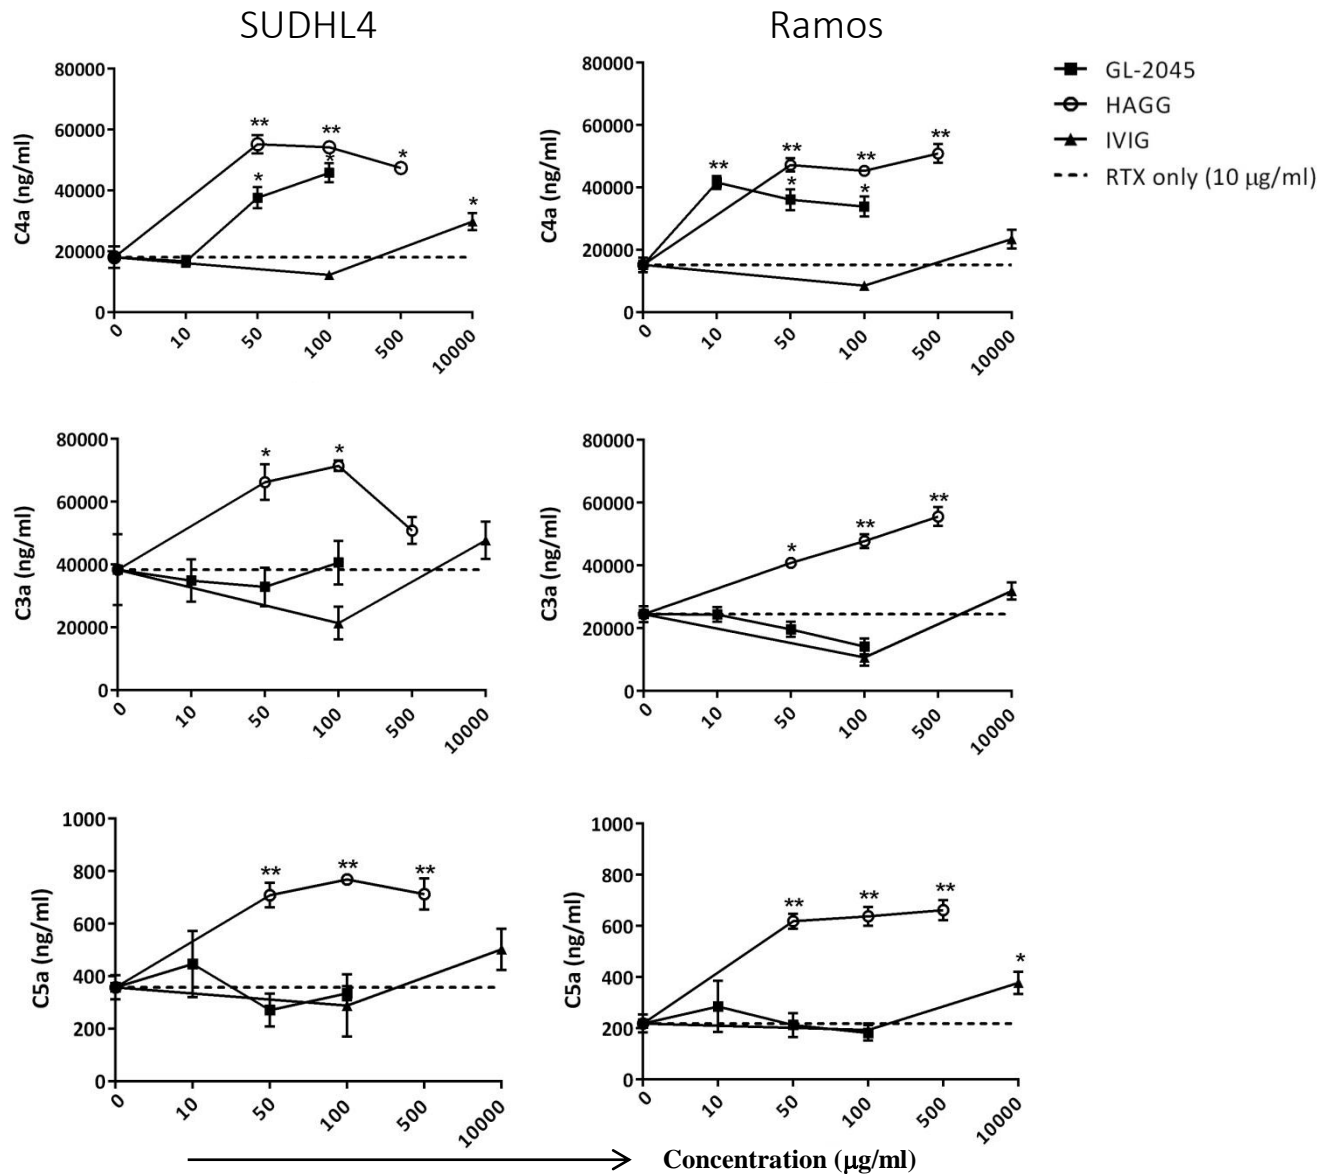

**Supplemental Figure 3. GL-2045 does not induce C3a or C5a in the supernatants of RTX mediated CDC assay.** The supernatant from cultures of SUDHL4 and Ramos cells used in Ab mediated CDC assays in the presence of GL-2045, HAGG or IVIG were collected and analyzed for C4a, C3a and C5a. The data represent mean  $\pm$  SD from at least three independent experiments. \* p < 0.05, \*\* p < 0.01, compared with RTX only, student t-test.

A.

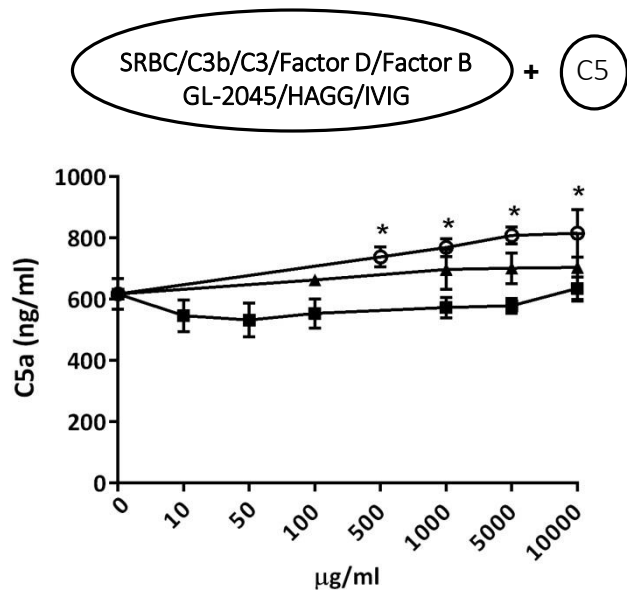

B.

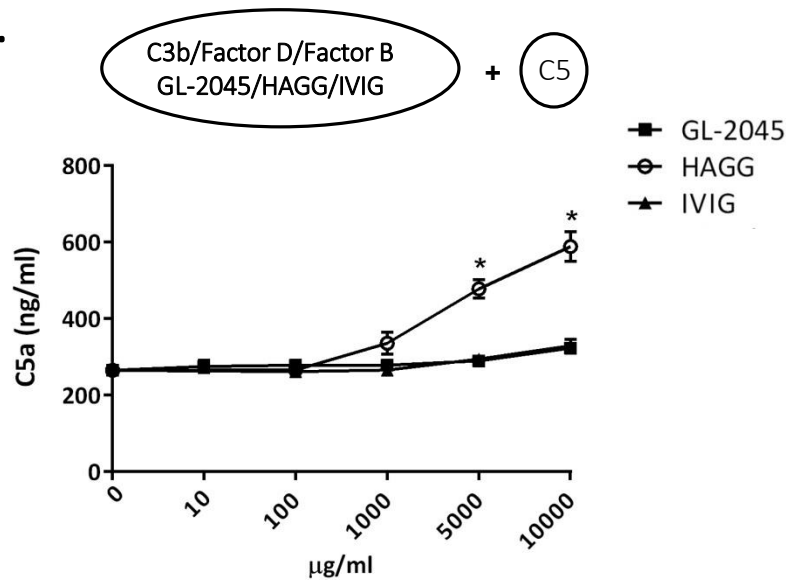

C.

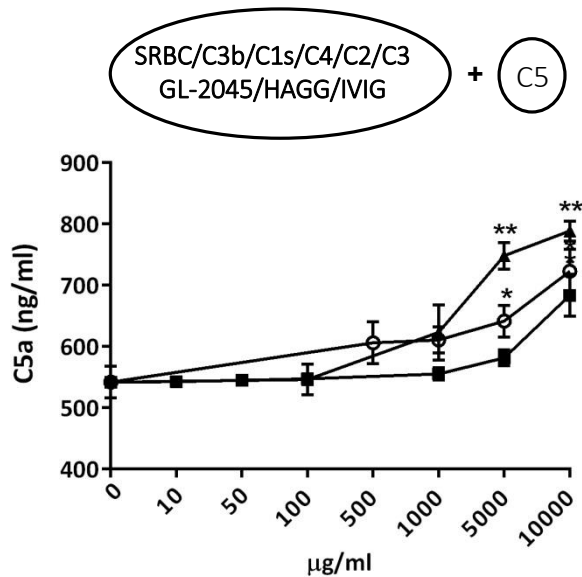

D.

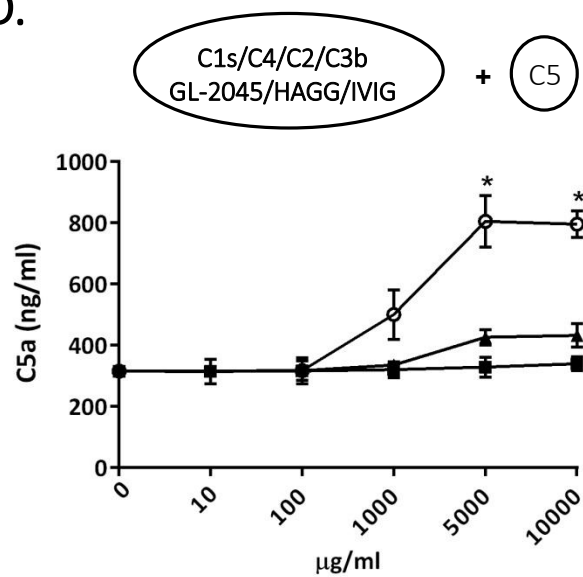

**Supplemental Figure 4. GL-2045 does not inhibit C5 convertases.** The impact of GL-2045, IVIG and HAGG on the function of the alternative or classical C5 convertases with (A, C) or without (B, D) SRBC, was evaluated by measuring C5a production. The data represent mean  $\pm$  SD from at least three independent experiments. \*  $p < 0.05$ , \*\*  $p < 0.01$ , compared with no treatment control, student t-test.

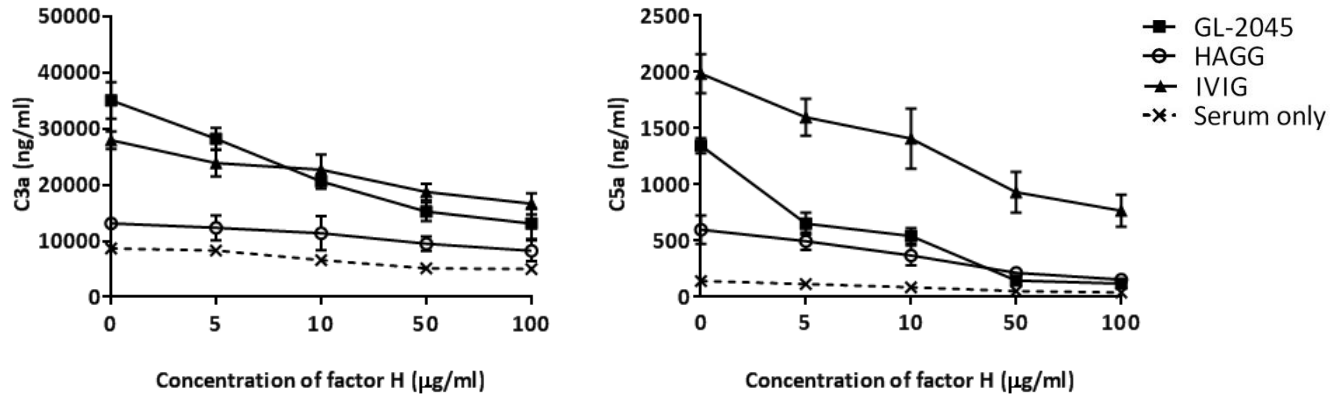

**Supplemental Figure 5.** Self-limited complement activation by GL-2045 and IVIG is dependent on Factor H. Factor H depleted serum was reconstituted with defined amounts of Factor H followed by exposure to 100µg/ml GL-2045, HAGG or IVIG for 90 minutes at 37°C. The levels of C3a and C5a were measured by ELISA. The results are shown as the mean  $\pm$  SD from three experiments.
